# Supplementary material for: Information management for high content live cell imaging
Source: Springer Nature journal article supplement (doi:10.1186/1471-2105-10-226), 2009-07-21
Supplement: 12859_2009_2956_MOESM12_ESM.pdf [file 12859_2009_2956_MOESM12_ESM.pdf]

Prepare samples

- Experimentalist information
- Hypothesis
- Treatments
- Protocols

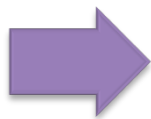

Acquire images

- Images
- Microscope setup

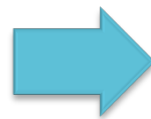

Analyse with CellTracker

- CellTracker Output
