# Supplementary material for: Information management for high content live cell imaging
Source: Springer Nature journal article supplement (doi:10.1186/1471-2105-10-226), 2009-07-21
Supplement: 12859_2009_2956_MOESM17_ESM.pdf [file 12859_2009_2956_MOESM17_ESM.pdf]

Import pre-described  
experiment from  
repository if  
appropriate

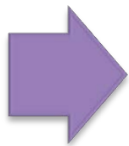

Import Microscope  
Data

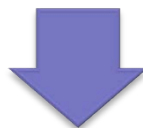

Annotate

- Select pre-existing values where available (Person, Protocol, Compounds and Plasmids)

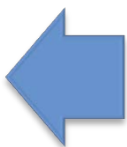

Import CellTracker  
Output

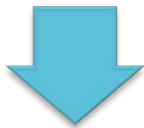

Upload to Repository
