# Supplementary material for: Information management for high content live cell imaging
Source: Springer Nature journal article supplement (doi:10.1186/1471-2105-10-226), 2009-07-21
Supplement: 12859_2009_2956_MOESM20_ESM.pdf [file 12859_2009_2956_MOESM20_ESM.pdf]

```

//Global Constants
SET half_minute=0.5 //Value for half a minute
SET threshold_multiplier=1.75 //Level of intensity considered a peak
//when no pre-stimulation.
SET extrapolation_size=10 //Number of timepoints to add when extrapolating
//data.
SET smooth_width=10 //Width of the smoothing window
SET runin_modifier=0.1 //How far below intensity at time 0 to set
//values for an artificial run-in.
SET max_detection_width=40 //Maximum peak width to detect.
SET fitpoly_width=7 //Peak width beyond which a polynomial is
//fitted.

DEFINE AnalysePeaks(timepoints, ratios) RETURNS peaklist, oscillation period

// Detect prestimulation period
SET timepoint_gap = timepoint[1] - timepoint[0]

FOR each timepoint
  IF current timepoint - previous timepoint > (timepoint_gap + half_minute) THEN
    SET prestimulation_end = current timepoint
  END IF
ENDFOR

// Calculate detection threshold
IF prestimulation_end is not 0 THEN
  SET detection_threshold = mean(prestimulation ratios) + 2*stddev(prestim ratios)
ELSE
  SET minimum_ratio = lowest ratio value
  SET detection_threshold = minimum_ratio * threshold_multiplier
END IF

// Extrapolate values
IF prestimulation_end is 0 THEN
  SET all timepoints = timepoint + extrapolation_size*timepoint_gap
  FOR count = 0 to extrapolation_size-1
    create new timepoint at timepoint_gap*count
    SET ratio for new timepoint to ratio at timepoint[0] - runin_modifier
  ENDFOR
ENDIF

IF derivative of ratios at final two timepoints is negative THEN
  REPEAT
    create new timepoint
    extrapolate new ratio using gradient as measured between previous two timepoints
    append new timepoint and ratio to the timepoints
  UNTIL ratio at final timepoint < detection_threshold
END IF

// Optimise detection width
FOR width = 1 to max_detection_width
  CALL detectPeaks(timepoints, ratios, threshold, width)
  STORE firstPeakPosition in FirstPeaks[width]
  IF variance(FirstPeaks) > 1 THEN
    SET detection_width = width
  ENDIF
ENDFOR

SET peaks = CALL detectPeaks(timepoints, ratios, threshold, detection_width)

IF number of peaks > 1 THEN
  FOR each peak
    STORE current peak position - previous peak position in peakDistances
  ENDFOR
  SET oscillation period = mean (peakDistances)
ENDIF
RETURN peaks, oscillation period

DEFINE detectPeaks(timepoints, ratios, threshold, detection_width) RETURNS peaklist

SET ratios = CALL smooth(ratios, smoothwidth)

FOR each ratio value
  IF slope direction between ratio values has changed from positive to flat or negative THEN
    IF ratio value > threshold THEN
      CALL fitpoly(time[current to current+detection_width],
        log(ratios[current to current+detection_width]), 2)
    ENDIF
    IF detection_width > fitpoly_width THEN
      SET peakHeight = height from fitpoly
      SET peakPosition = position from fitpoly
    ELSE
      SET peakHeight = max(ratios[current to current+detection_width])
      SET peakPosition = time of peakHeight
    ENDIF
    STORE peakHeight, peakPosition in peaks
  ENDIF
ENDFOR
RETURN peaks

```
