# Supplementary figures and images for: Information management for high content live cell imaging
Source: Springer Nature journal article supplement (doi:10.1186/1471-2105-10-226), 2009-07-21

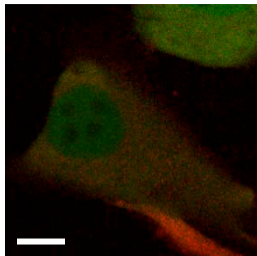

0

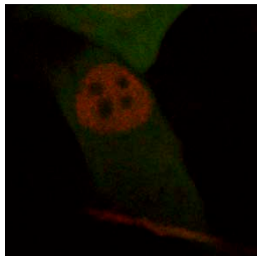

50

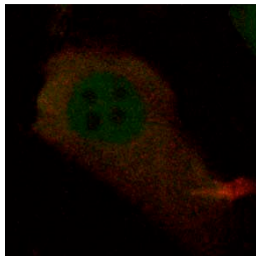

100

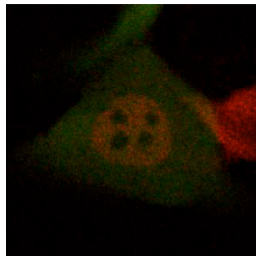

150

Time (mins)

Supplement: 12859_2009_2956_MOESM11_ESM.pdf [file 12859_2009_2956_MOESM11_ESM.pdf]

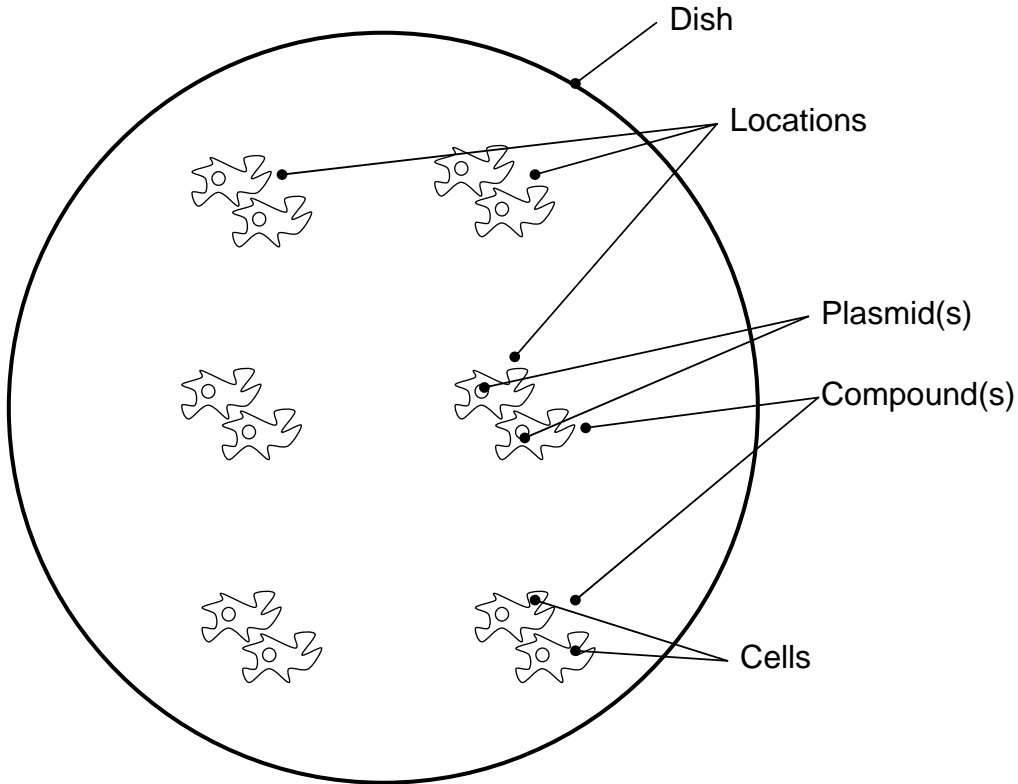

Supplement: 12859_2009_2956_MOESM13_ESM.pdf [file 12859_2009_2956_MOESM13_ESM.pdf]

N:C Ratio

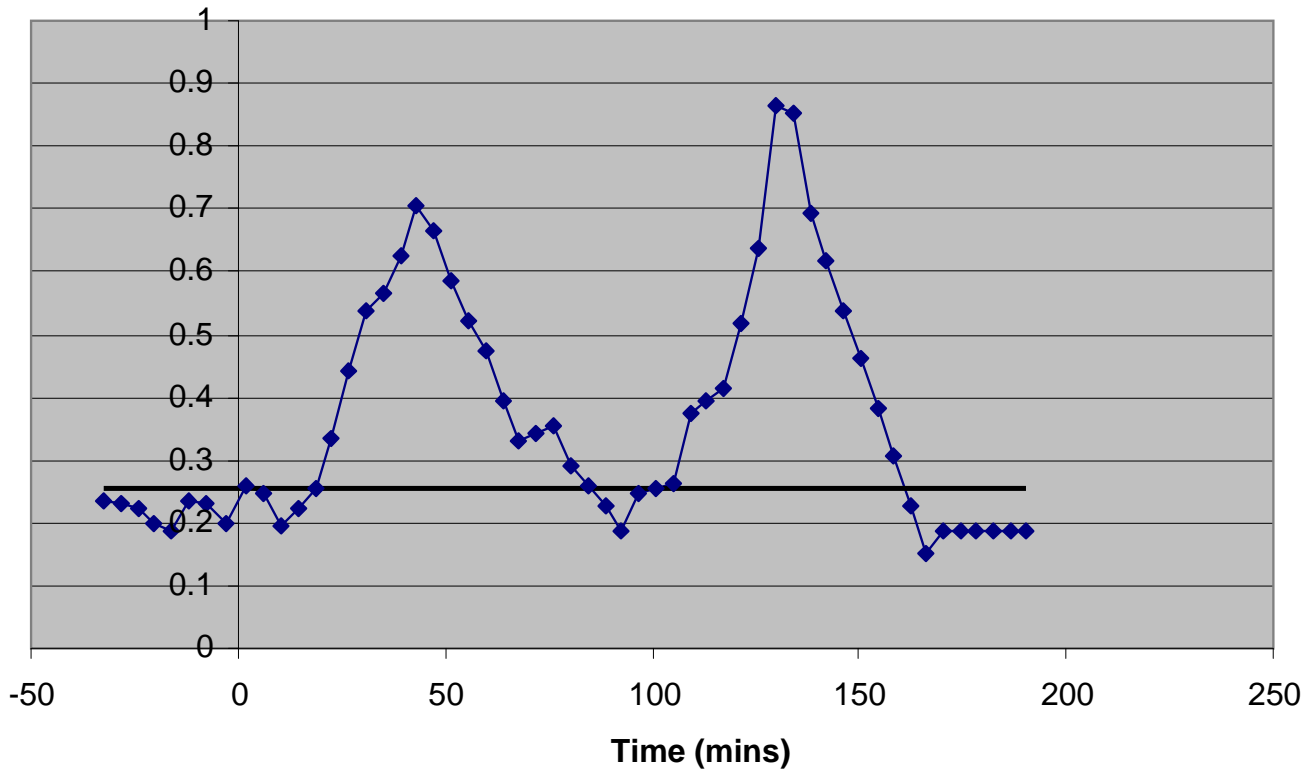

Supplement: 12859_2009_2956_MOESM19_ESM.pdf [file 12859_2009_2956_MOESM19_ESM.pdf]

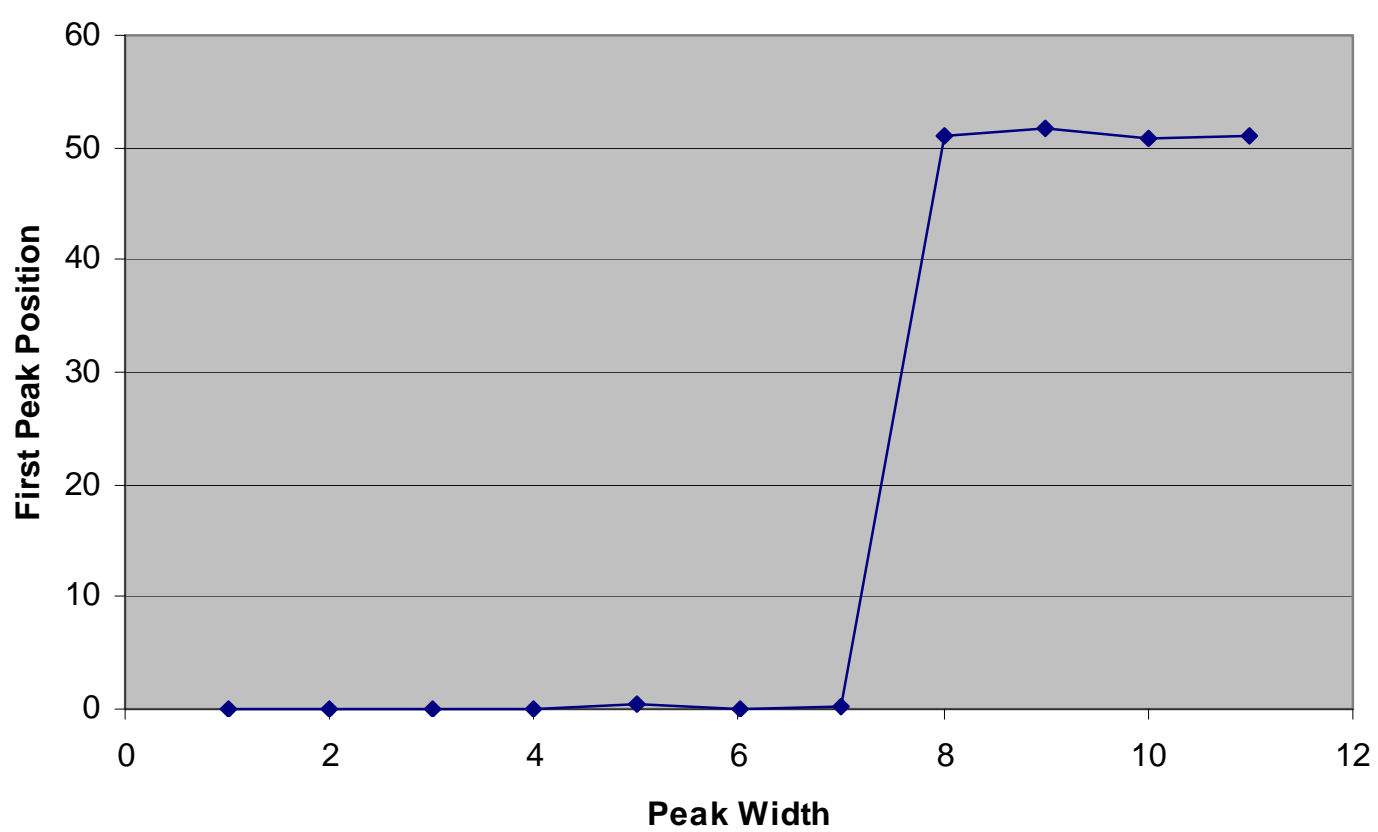

Supplement: 12859_2009_2956_MOESM21_ESM.pdf [file 12859_2009_2956_MOESM21_ESM.pdf]
